# Supplementary material for: The king’s spice cabinet–Plant remains from Gribshunden, a 15th century royal shipwreck in the Baltic Sea
Source: PLoS One. 2023 Jan 26;18(1):e0281010. doi: 10.1371/journal.pone.0281010 (PMC9879437; doi:10.1371/journal.pone.0281010)
Supplement: S1 Table — (XLSX) [file pone.0281010.s001.xlsx]

## Sheet: Blad1
Analysresultat av makrofossila växtlämningar.		Table 1. List of archaeobotanical plant remains from the Gribshunden wreck site.
				Tidsperiod
				C14 datering
				Kontext:
				SL:
					Sample no.		1	2	3	4	5
					Sample vol. (liter)		2	2	1.6	0.5	water sample
	Sädesslag	Cereal grain	Swe		Botanical remains
Poaceae	Hordeum vulgare ssp. vulgare	Hordeum vulgare ssp. vulgare	Skalkorn		grain	kärna	·	·	·	·
Poaceae	Hordeum vulgare var. nudum	Hordeum vulgare var. nudum	Naket korn		grain	kärna	·	·	·	·
Poaceae	Hordeum vulgare coll.	Hordeum vulgare coll.	Korn i allmänhet		grain	kärna	·	·	·	·
Poaceae	Triticum aestivum	Triticum aestivum	Brödvete		grain	kärna	·	·	·	·
Poaceae	Triticum cf. aestivum	Triticum cf. aestivum	Brödvete		grain	kärna	·	·	·	·
Poaceae	Triticum dicoccum	Triticum dicoccum	Emmer		grain	kärna	·	·	·	·
Poaceae	Triticum cf. dicoccum	Triticum cf. dicoccum	Emmer		grain	kärna	·	·	·	·
Poaceae	Triticum spelta	Triticum spelta	Speltvete		grain	kärna	·	·	·	·
Poaceae	Triticum dicoccum/spelta	Triticum dicoccum/spelta	Emmer/speltvete		grain	kärna	·	·	·	·
Poaceae	Triticum monococcum	Triticum monococcum	Enkorn		grain	kärna	·	·	·	·
Poaceae	cf. Triticum dicoccum	cf. Triticum dicoccum	Emmer		grain	kärna	·	·	·	·
Poaceae	Triticum sp.	Triticum cf. aestivum	vete ospec.	Bread wheat	testa	kärna	·	·	1	·	·
Poaceae	Triticum sp.	Triticum sp.	vete ospec.	Wheat indet.	testa	kärna	·	2	·	·	·
Poaceae	Secale cereale	Secale cereale	Råg		grain	kärna	·	·	·	·
Poaceae	Avena sativa	Avena sativa	Havre		grain	kärna	·	·	·	·
Poaceae	Avena cf. sativa	Avena cf. sativa	Havre		grain	kärna	·	·	·	·
Poaceae	Panicum miliaceum	Panicum miliaceum	Hirs		grain	kärna	·	·	·	·
Poaceae	Cerealia indet.	Cerealia indet.	Sädeskorn ospec.		grain	kärna	·	·	·	·
	Sädesslag agndelar	Chaff
Poaceae	Hordeum vulgare	Hordeum vulgare	Korn		rachis fragment	axled	·	·	·	·
Poaceae	Hordeum vulgare	Hordeum vulgare	Korn		rachis node	småax bas	·	·	·	·
Poaceae	Hordeum vulgare	Hordeum vulgare	Korn		glume bas	småax bas	·	·	·	·
Poaceae	Hordeum vulgare	Hordeum vulgare	Korn		lemma/pelea	lemma/pelea	·	·	·	·
Poaceae	Triticum dicoccum	Triticum dicoccum	Emmer		glume bas	småax bas	·	·	·	·
Poaceae	Triticum aestivum	Triticum aestivum	Brödvete		glume bas	småax bas	·	·	·	·
Poaceae	Avena sp.	Avena sp.	Havre ospec.		awn	borst	·	·	·	·
Poaceae	Avena sp.	Avena sp.	Havre ospec.		glume bas	agnrest	·	·	·	·
Poaceae	Panicum miliaceum	Panicum miliaceum	Hirs		lemma/pelea	skärmfjäll	·	·	·	·
Poaceae	Cerealia indet. stråfragment	Cerealia indet. stråfragment	Sädesslag ospec.		straw	strå	·	·	·	·
Poaceae	Cerealia indet. agnrest	Cerealia indet. agnrest	Sädesslag ospec.		chaff indet.	agnrest	·	·	·	·
Brassicaceae	Camelina sativa	Camelina sativa	Oljedådra		seed	frö	·	·	·	·
Cannabaceace	Cannabis sativa	Cannabis sativa	Hampa		fruit	frukt	·	·	·	·
	Baljväxter	Legumes
Fabaceae	cf. Pisum sativum	cf. Pisum sativum	Ärt		seed	frö	·	·	·	·
Fabaceae	Vicia faba	Vicia faba	Ärt		seed	frö	·	·	·	·
Fabaceae	Vicia sativa	Vicia sativa			seed	frö
	Olje-/fiberväxter	Oilseeds
Brassicaceae	Camelina sativa	Camelina sativa	Oljedådra		seed	frö	·	·	·	·
Cannabaceace	Cannabis sativa	Cannabis sativa	Hampa		fruit	frukt	·	·	·	·
Linaceae	Linum usitatissimum	Linum usitatissimum	Lin	Flax	seed	frö	·	·	1	·	·
	Grönsaker	Fruits and vegetables
Apiaceae	Apium graveolens	Apium graveolens	Selleri		fruit	frukt	·	·	·	·
Apiaceae	Pastinaca sativa	Pastinaca sativa	Palternacka		fruit	frukt	·	·	·	·
Cucurbitaceae	Cucumis sativus	Cucumis sativus	Gurka	Cucumber	seed	frö	·	1	·	·	·
Brassicaceae	Brassica napus	Brassica napus	Kålrot		seed	frö	·	·	·	·
Brassicaceae	Brassica rapa	Brassica rapa	Rova		seed	frö	·	·	·	·
Brassicaceae	Brassica oleracea	Brassica oleracea	Kål		seed	frö	·	·	·	·
Brassicaceae	Brassica sp.	Brassica sp.	Kålväxt		seed	frö	·	·	·	·
Vitaceae	Vitis vinifera	Vitis vinifera	Vindruva	Grape	seed	frö	·	1	·	·	·
Rosaceae	Rubus fruticosus	Rubus fruticosus	Björnbär	Blackberry	seed	frö	·	1	1	·	·
Rosaceae	Rubus idaeus	Rubus idaeus	Hallon	Raspberry	seed	frö	·	·	1	·	·
Rosaceae	Rubus caesius	Rubus caesius	Blåhallon		seed	frö	·	·	·	·	·
Rosaceae	Rubus sp.	Rubus sp.	Rubus ospec.		seed	frö	·	·	·	·	·
Rosaceae	Fragaria vesca	Fragaria vesca	Smultron		seed	nöt	·	·	·	·	·
Myricaceae	Myrica gale	Myrica gale	Pors		seed	nöt	·	·	·	·	·
Poaceae	Arrhenatherum elatius ssp. bulbosum	Arrhenatherum elatius ssp. bulbosum	Pärlhavre		tuber	rotknöl	·	·	·	·	·
Rosaceae	Filipendula vulgaris	Filipendula vulgaris	Brudbröd		tuber	rotknöl	·	·	·	·	·
Ranunculaceae	Ranunculus ficaria	Ranunculus ficaria	Svalört		tuber	rotknöl	·	·	·	·	·
		Berry, indet.			seed		·	·	1	·	·
	Krydd- eller medicinalväxter	Herbs and spices (and medicinal plants)
Apiaceae	Anethum graveolens	Anethum graveolens	Dill	Dill	fruit	frukt	·	1	2	·	·
Asteraceae	Cichorium intybus	Cichorium intybus	Cikoria		fruit	frukt	·	·	·	·	·
Asteraceae	Inula helenium	Inula helenium	Ålandsrot		fruit	frukt	·	·	·	·	·
Brassicaceae	Brassica nigra	Brassica nigra	Svartsenap	Black mustard	seed	frö	7	82	33	4	·
Apiaceae	Carum carvi	Carum carvi	Kummin	Caraway	fruit	frukt	1	·	2	·	·
Apiaceae	Carum carvi	cf. Carum carvi	Kummin	Caraway	fruit, mesocarp missing	frukt	3	1	4	·	·
Apiaceae	Foeniculum vulgare	Foeniculum vulgare	Fänkol		fruit	frukt	·	·	·	·
Apiaceae	Petroselinum crispum	Petroselinum crispum	Persilja		fruit	frukt	·	·	·	·
Brassicaceae	Lepidium sativa	Lepidium sativa	Smörgåskrasse		seed	frö	·	·	·	·
Iridaceae	Crocus sativus	Crocus sativus	Saffran	Saffron	stigmas	stigma	√	√	√	√	450 ml
Iridaceae	Crocus sativus	Crocus sativus		Saffron	ground stigmas (powder conglomerates)	stigma	·	·	√	·	·
		Humulus lupulus		Hop	fruit		1	·	·	·	·
Solanaceae	Hyoscyamus niger	Hyoscyamus niger	Bolmört	Henbane	seed	frö	·	1	·	·	·
Lamiaceae	Leonurus cardiaca	Leonurus cardiaca	Hjärtstilla		fruit	frukt	·		·	·	·
Lamiaceae	Origanum vulgare	Origanum vulgare	Kungsmynta		seed	frö	·	·	·	·	·
Piperaceae	Piper nigrum	Piper nigrum	Svartpeppar	Black pepper	fruit (peppercorn)	frukt	179	979	658	139	·
Piperaceae	Piper nigrum	Piper nigrum	Grönpeppar	Pepper	stalk segment	fröställning	1	9	6	·	·
Myrtaceae	Syzygium aromaticum	Syzygium aromaticum	Kryddnejlika	Clove	whole flower bud		·	5	3	1	·
Myrtaceae	Syzygium aromaticum	Syzygium aromaticum		Clove	hypanthium, complete/near complete		8	32	14	7	·
Myrtaceae	Syzygium aromaticum	Syzygium aromaticum		Clove	hypanthium, half or less		23	88	62	27	·
Myrtaceae	Syzygium aromaticum	Syzygium aromaticum		Clove	globular head		5	17	11	·	·
Myrtaceae	Syzygium aromaticum	Syzygium aromaticum		Clove	petals		9	15	24	3	·
Myrtaceae	Syzygium aromaticum	Syzygium aromaticum		Clove	ovary, complete/near complete		18	42	43	11	·
Myrtaceae	Syzygium aromaticum	Syzygium aromaticum		Clove	stalk segment		1	8	9	1	·
Piperaceae	Piper nigrum	Piper nigrum	Grönpeppar	Green pepper	fruit	frukt	·	·	·	·	·
Zingiberaceae	Zingiber officinale	Zingiber officinale	Ingefära	Ginger	rhizome epidermis parts	rotstock	5	34	23	2	·
	Insamlade bär, nötter, stamknölar	Nuts
Caprifoliaceae	Sambucus nigra	Sambucus nigra	Fläder		seed	frö	·	·	·	·
Corylaceae	Corylus avellana	Corylus avellana	Hassel		shell frah´gment	nötskal	·	·	·	·
Cupressaceae	Juniperus communis	Juniperus communis	En		seed	frö	·	·	·	·
Ericaceae	Vaccinium sp.	Vaccinium sp.	Skogsbär		seed	frö	·	·	·	·
Fagaceae	Quercus sp.	Quercus sp.	Ek		shell fragment	ollonskal	·	·	·	·
		Corylus avellana		Hazel	endocarp fragm.	nötskal	1	·	·	·	·
Rosaceae	Prunus dulcis	Prunus dulcis	Mandel	Almond	testa, complete	fröskal	8	35	15	17	·
Rosaceae	Prunus dulcis	Prunus dulcis		Almond	testa, half or less	fröskal	29	126	91	25	·
Rosaceae	Prunus dulcis	Prunus dulcis		Almond	seed fragm.	fröskal	√	√	√	√	·
		Prunus dulcis		Almond	endocarp fragm.	nötskal	·	8	6	1	·
	Exotiska växter	Import
Moraceae	Ficus carica	Ficus carica	Fikon		fruit	frukt	·	·	·	·
	Exotiska importer	Exotiska importer
	Åkerogräs och ruderatmarksväxter	Weeds
Apiaceae	Aethusa cynapium	Aethusa cynapium	Vildpersilja		fruit	frukt
Apiaceae	Aegopodium podagraria	Aegopodium podagraria	Kirlskål		fruit	frukt
Asteraceae	Centaurea cyanus	Centaurea cyanus	Blåklint		fruit	frukt
Asteraceae	Lapsana communis	Lapsana communis	Harkål		fruit	frukt	·	·	·	·
Asteraceae	Anthemis arvensis	Anthemis arvensis	Åkerkulla		fruit	frukt
Asteraceae	Anthemis cotula	Anthemis cotula	Kamumillkulla		fruit	frukt
Asteraceae	Artemisia vulgaris	Artemisia vulgaris	Gråbo		fruit	frukt
Asteraceae	Sonchus oleraceus	Sonchus oleraceus	Kålmolke		fruit	frukt	·	·	·	·
Asteraceae	Cirsium arvense	Cirsium arvense	Åkertistel		fruit	frukt	·	·	·	·
Asteraceae	Sonchus asper	Sonchus asper	Svinmolke		fruit	frukt
Asteraceae	Crepis tectorum	Crepis tectorum	Klofibbla		fruit	frukt
Boraginaceae	Anchusa officinalis	Anchusa officinalis	Oxtunga		seed	frö
Boraginaceae	Lithospermum arvensis	Lithospermum arvensis	Sminkrot
Brassicaceae	Raphanus raphanistrum	Raphanus raphanistrum	Åkerrättika		fruit	frukt	·	·	·	·
Brassicaceae	Capsella bursa-pastoris	Capsella bursa-pastoris	Lomme		seed	frö	·	·	·	·
Brassicaceae	Sinapis arvensis	Sinapis arvensis	Åkerkål		seed	frö	·	·	·	·
Brassicaceae	Sinapis arvensis	Sinapis arvensis	Åkersenap		seed	frö	·	·	·	·
Brassicaceae	Thlaspi arvense	Thlaspi arvense	Penningört		seed	frö	·	·	·	·
Brassicaceae	Berteroa incana	Berteroa incana	Sandvita		seed	frö
Brassicaceae	Neslia paniculata	Neslia paniculata	Korndådra		fruit /pod	frukt (skida)	·	·	·	·
Brassicaceae	Lepidium sp.	Lepidium sp.	Krassingar		seed	frö	·	·	·	·
Caryophyllaceae	Arenaria serpyllifolia	Arenaria serpyllifolia	Sandnarv		seed	frö	·	·	·	·
Caryophyllaceae	Stellaria media	Stellaria media	Våtarv		seed	frö	·	·	·	·
Caryophyllaceae	Cerastium fontanum-typ	Cerastium fontanum-typ	Hönsarv-typ		seed	frö	·	·	·	·
Caryophyllaceae	Scleranthus annuus	Scleranthus annuus	Grönknavel		seed w. pod	frö med foder	·	·	·	·
Caryophyllaceae	Agrostemma githago	Agrostemma githago	Klätt		seed	frö	·	·	·	·
Caryophyllaceae	Silene latifolia	Silene latifolia	Vitblära		seed	frö
Caryophyllaceae	Spergula arvensis	Spergula arvensis	Åkerspärgel		seed	frö	·	·	·	·
Chenopodiaceae	Atriplex patula	Atriplex patula	Vägmålla		nut	nöt
Chenopodiaceae	Chenopodium album-typ	Chenopodium album-typ	Svinmålla-typ		nut	nöt	·	·	·	·
Chenopodiaceae	Chenopodium glaucum/rubrum	Chenopodium glaucum/rubrum	Blåmålla/rödmålla		nut	nöt	·	·	·	·
Chenopodiaceae	Chenopodium bonus-henricus	Chenopodium bonus-henricus	Lungrot		nut	nöt	·	·	·	·
Chenopodiaceae	Chenopodium sp.	Chenopodium sp.	Mållor ospec.		nut	nöt	·	·	·	·
Euphorbiaceae	Euphorbia helioscopia	Euphorbia helioscopia	Revormstörel		seed	frö	·	·	·	·
Fabaceae	Medicago lupulina	Medicago lupulina	Humlelusern		seed	frö	·	·	·	·
Fabaceae	Melilotus albus	Melilotus albus	Vit sötväppling		seed	frö	·	·	·	·
Fabaceae	Vicic hirsuta	Vicic hirsuta	Duvvicker		seed
Fabaceae	Vicic hirsuta/tetrasperma	Vicic hirsuta/tetrasperma	Duvvicker/sparvvicker		seed
Laminaceae	Galeopsis bifida	Galeopsis bifida	Toppdån		fruit	frukt
Laminaceae	Galeopsis speciosa/tetrahit	Galeopsis speciosa/tetrahit	Hampdåm/Pipdån		fruit	frukt
Laminaceae	Galeopsis ladanum	Galeopsis ladanum	Mjukdån		fruit	frukt
Lamiaceae	Lamium cf. album	Lamium cf. album	cf. Vitplister		fruit	frukt	·	·	·	·
Lamiaceae	Lamium cf. purpureum	Lamium cf. purpureum	cf. Rödplister		fruit	frukt	·	·	·	·
Lamiaceae	Metha arvensis	Metha arvensis	Åkermynta
Lamiaceae	Stachys arvensis	Stachys arvensis	Åkersyska		fruit	frukt	·	·	·	·
Malvaceae	Malva pusilla	Malva pusilla	Vit kattost		seed	frö
Malvaceae	Malva sp.	Malva sp.	Kattost/malva		seed	frö	·	·	·	·
Papaveraceae	Fumaria officinalis	Fumaria officinalis	Jordrök		seed
Papaveraceae	Papaver cf. argemone	Papaver cf. argemone	Spikvallmo		seed	frö	·	·	·	·
Papaveraceae	Papaver dubium/rhoeas	Papaver dubium/rhoeas	Rågvallmo/kornvallmo		seed	frö	·	·	·	·
Plantaginaceae	Plantago major	Plantago major	Groblad		seed	frö	·	·	·	·
Poaceae	Bromus arvensis	Bromus arvensis	Renlosta		seed
Poaceae	Bromus secalinus	Bromus secalinus	Råglosta		fruit	frukt	·	·	·	·
Poaceae	Elytriga repens	Elytriga repens	Kvickrot		fruit	frukt
Poaceae	Poa annua	Poa annua	Vitgröe		fruit	frukt
Poaceae	Setaria veridis	Setaria veridis	Kavelhirs		fruit	frukt	·	·	·	·
Poaceae	Setaria verticillata	Setaria verticillata	Sträv kavelhirs		fruit	frukt	·	·	·	·
Poaceae	Avena strigosa	Avena strigosa	Purrhavre		fruit	frukt	·	·	·	·
Poaceae	Avena fatua	Avena fatua	Flyghavre		fruit	kärna	·	·	·	·
Polygonaceae	Rumex crispus	Rumex crispus	Krusskräppa		fruit	nöt	·	·	·	·
Polygonaceae	Rumex obtusifolius typ	Rumex obtusifolius typ	Tomtskräppa		fruit	nöt
Polygonaceae	Persicaria lapathifolia	Persicaria lapathifolia	Vanlig pilört		fruit	nöt	·	·	·	·
Polygonaceae	Persicaria maculosa	Persicaria maculosa	Åkerpilört		fruit	nöt	·	·	·	·
Polygonaceae	Persicaria lapathifolia/maculosa	Persicaria lapathifolia/maculosa	Vanlig pilört/åkerpilört		fruit	nöt	·	·	·	·
Polygonaceae	Persicaria hydropiper	Persicaria hydropiper	Bitterpilört		fruit	nöt
Polygonaceae	Fallopia convolvulus	Fallopia convolvulus	Åkerbinda		fruit	nöt	·	·	·	·
Polygonaceae	Polygonum aviculare	Polygonum aviculare	Trampört		fruit	nöt	·	·	·	·
Ranunculaceae	Ranunculus repens typ	Ranunculus repens typ	Revsmörblomma		fruit	nöt	·	·	·	·
Rosaceae	Potentilla argentea typ	Potentilla argentea typ	Femfingerört		fruit	nöt	·	·	·	·
Primulaceae	Anagallis arvensis	Anagallis arvensis	Rödmire		fruit	frö
Rubiaceae	Galium cf. spurium	Galium cf. spurium	cf. Småsnärjmåra		fruit	frukt	·	·	·	·
Rubiaceae	Galium cf. aparine	Galium cf. aparine	Snärjmåra		fruit	frukt	·	·	·	·
Scropphulariaceae	Veronica agrestis	Veronica agrestis	Åkerveronika		seed	frö	·	·	·	·
Scropphulariaceae	Linaria vulgaris	Linaria vulgaris	Gulsporre
Scropphulariaceae	Odontites vernus	Odontites vernus	Åkerrödtoppa
Solanaceae	Solanum nigrum	Solanum nigrum	Nattskatta			frö	·	·	·	·
Urticaceae	Urtica dioica	Urtica dioica	Brännässla			nöt	·	·	·	·
Urticaceae	Urtica urens	Urtica urens	Etternässla			nöt	·	·	·	·
Violaceae	Viola arvensis-typ	Viola arvensis-typ	Åkerviol			frö	·	·	·	·
	Växter på torr gräsmark (Torrängar)	Dry grasslands
Asteraceae	Centaurea jacea	Centaurea jacea	Rödklint			frukt
Asteraceae	Centaurea scabiosa	Centaurea scabiosa	Väddklint			frukt
Asteraceae	Artemisia campestris	Artemisia campestris	Fältmalört
Asteraceae	Hypochoeris maculata	Hypochoeris maculata	Slåtterfibbla
Asteraceae	Leontodon hispidus	Leontodon hispidus	Sommarfibbla
Asteraceae	Pilosella officinarum	Pilosella officinarum	Gråfibbla
Asteraceae	Crepis praemorsa	Crepis praemorsa	Klasefibbla
Asteraceae	Antennaria dioica	Antennaria dioica	Kattfot
Asteraceae	Achillea millefolium	Achillea millefolium	Röllika
Campanulaceae	Campanula sp.	Campanula sp.	Blåklocka			frö
Caryophyllaceae	Stellaria graminea	Stellaria graminea	Grässtjärnblomma			frö	·	·	·	·
Caryophyllaceae	Silene nutans	Silene nutans	Backglim			frö
Caryophyllaceae	Dianthus deltoides	Dianthus deltoides	Backnejlika			frö
Caryophyllaceae	Lychnis viscaria	Lychnis viscaria	Tjärblomster
Cyperaceae	Carex ovalis	Carex ovalis	Harstarr			nöt
Dipsacaceae	Knautia arvensis	Knautia arvensis	Åkervädd			frukt
Fabaceae	Anthyllis vulneraria ssp. vulenaria	Anthyllis vulneraria ssp. vulenaria	Liten getväppling
Fabaceaea	Trifolium montanum	Trifolium montanum	Backklöver
Gentianaceae	Gentianella campestris	Gentianella campestris	Fältgentina
Geraniaceae	Geranium sanguineum	Geranium sanguineum	Blodnäva
Laminaceae	Dracocephalum ruyschiana	Dracocephalum ruyschiana	Drakblomma
Laminaceae	Origanium vulgare	Origanium vulgare	Kungsmynta			frö
Laminaceae	Thymus serpyllum ssp. serpyllum	Thymus serpyllum ssp. serpyllum	Backtimjan			frö
Orchidaceae	Orchis mascula	Orchis mascula	Sankt Pers nycklar
Plantaginaceae	Plantago lanceolata	Plantago lanceolata	Svartkämpar			frö	·	·	·	·
Poaceae	Festuca rubra	Festuca rubra	Rödsvingel			frukt
Poaceae	Festuca ovina	Festuca ovina	Fårsvingel
Poaceae	Helictotrichon pratense	Helictotrichon pratense	Ängshavre			frukt
Poaceae	Thymus serpyllum	Thymus serpyllum	Backtimjan			frukt
Poaceae	Phleum phleoides	Phleum phleoides	Flentimotej			frukt
Poaceae	Bromus hordeaceus	Bromus hordeaceus	Luddlosta			frukt
Poaceae	Agrostis capillaris	Agrostis capillaris	Rödven			frukt
Poaceae	Anthoxanthum odoratum	Anthoxanthum odoratum	Vårbrodd			frukt	·	·	·	·
Ranunculaceae	Ranunculus polyanthemos	Ranunculus polyanthemos	Backsmörblomma
Ranunculaceae	Pulsatilla pratensis	Pulsatilla pratensis	Fältsippa
Rosaceae	Fragaria viridis	Fragaria viridis	Backsmultron
Rubiaceae	Galium verum	Galium verum	Gulmåra				·	·	·	·
Scropphulariaceae	Rhinanthus minor ssp. minor	Rhinanthus minor ssp. minor	Äkta ängsskallra
Violaceae	Viola hirta	Viola hirta	Buskviol
	Växter på fuktig mark (Fuktängar)	Wet grass lands
Apiaceae	Selinum carvifolia	Selinum carvifolia	Krusfrö
Asteraceae	Leontodon autumnalis	Leontodon autumnalis	Höstfibbla
Asteraceae	Cirsium palustre	Cirsium palustre	Kärrtistel
Asteraceae	Angelica sylvestris	Angelica sylvestris	Strätta
Asteraceae	Cirsium oleraceum	Cirsium oleraceum	Kåltistel
Asteraceae	Eupatorium cannabium	Eupatorium cannabium	Hampflockel
Caryophyllaceae	Lychnis flos-cuculi	Lychnis flos-cuculi	Gökblomster			frö
Caryophyllaceae	Stellaria palustris	Stellaria palustris	Kärrstjärnblomma
Cypreaceae	Carex disticha	Carex disticha	Plattstarr
Cypreaceae	Carex flacca	Carex flacca	Slankstarr
Cypreaceae	Carex capillaris	Carex capillaris	Hårstarr
Cypreaceae	Carex publicaris	Carex publicaris	Loppstarr
Cyperaceae	Carex lepidocarpa	Carex lepidocarpa	Näbbstarr			nöt	·	·	·	·
Cypreaceae	Carex hostiana	Carex hostiana	Ängsstarr
Cyperaceae	Carex nigra	Carex nigra	Hundstarr			nöt
Cyperaceae	Eleocharis sp.	Eleocharis sp.	Säv			nöt	·	·	·	·
Dipacaceae	Succisa pratensis	Succisa pratensis	Ängsvädd
Fabacea	Lotus corniculatus	Lotus corniculatus	Käringtand
Fabaceae	Trifolium repens	Trifolium repens	Vitklöver			frö	·	·	·	·
Juncaceae	Juncus effusus	Juncus effusus	Veketåg
Juncaceae	Eleocharis quinqueflora	Eleocharis quinqueflora	Tagelsäv
Lamiaceae	Prunella vulgaris	Prunella vulgaris	Brunört			frö	·	·	·	·
Lamiaceae	Glechoma hederacea	Glechoma hederacea	Jordreva			frukt	·	·	·	·
Linaceae	Linum catharticum	Linum catharticum	Vildlin			frö	·	·	·	·
Orchidaceae	Dactylorhiza incarnata	Dactylorhiza incarnata	Ängsnycklar
Orchidaceae	Gymnadenia conopsea	Gymnadenia conopsea	Brudsporre
Parnassiaceae	Parnassia palustris	Parnassia palustris	Slåtterblomma
Poaceae	Calamagrostis canescens	Calamagrostis canescens	Grenrör
Poaceae	Briza media	Briza media	Darrgräs			frukt
Poaceae	Deschampis cespitosa	Deschampis cespitosa	Tuvtåtel			frukt
Polygonaceae	Rumex acetosa-typ	Rumex acetosa-typ	Ängssyra-typ			nöt	·	·	·	·
Polygonaceae	Bistorta vivipara	Bistorta vivipara	Ormrot			nöt
Primulaceae	Lysimachia vulgaris	Lysimachia vulgaris	Videört
Primulaceae	Primula farinosa	Primula farinosa	Majviva
Ranunculaceae	Ranunculus acris typ	Ranunculus acris typ	Smörblommor			nöt	·	·	·	·
Ranunculaceae	Thalictrum flavum	Thalictrum flavum	Ängsruta
Ranunculaceae	Trollius europaeus	Trollius europaeus	Smörboll
Rosaceae	Geum rivale	Geum rivale	Humleblomster
Rosaceae	Potentilla palustris	Potentilla palustris	Kråkklöver			nöt	·	·	·	·
Rosaceae	Potentilla erecta typ	Potentilla erecta typ	Blodrot			nöt	·	·	·	·
Rosaceae	Filipendula ulmaria	Filipendula ulmaria	Älggräs			nöt
Rosaceae	Geum rivale	Geum rivale	Humleblomster
Rubiaceae	Galium palustre	Galium palustre	Vattenmåra
Saxifragaceae	Parnassia palustris	Parnassia palustris	Slåtterblomma
Scropphulariaceae	Rhinanthus serotinus	Rhinanthus serotinus	Höskallra
Scropphulariaceae	Euphrasia stricta	Euphrasia stricta	Ögontröst
Solanaceae	Solanum dulcamara	Solanum dulcamara	Besksöta			frö	·	·	·	·
	Övriga gräsmarksväxter	Grassland
Apiacea	Pimpinella major/saxifraga	Pimpinella major/saxifraga	Stor bockrot/bockrot
Asteraceae	Leontodon autumnalis	Leontodon autumnalis	Höstfibbla			frukt	·	·	·	·
Asteraceae	Centaurea jacea	Centaurea jacea	Rödklint
Asteraceae	Scorzonera humilis	Scorzonera humilis	Svinrot
Asteraceae	Leucanthemum vulgare	Leucanthemum vulgare	Prästkrage
Asteraceae	Arnica montana	Arnica montana	Slåttergubbe
Caryophyllaceae	Herniaria glabra	Herniaria glabra	Knytling
Caryophyllaceae	Silene vulgaris-typ	Silene vulgaris-typ	Smällglim			frö	·	·	·	·
Fabaceae	Vicia/Lathyrus	Vicia/Lathyrus	Vicker/vial			frö	·	·	·	·
Fabaceae	Vicia sp.	Vicia sp.	Vicker			frö	·	·	·	·
Fabaceae	Trifolium pratense	Trifolium pratense	Rödklöver			frö	·	·	·	·
Fabaceae	Trifolium medium	Trifolium medium	Skogsklöver			frö
Fabaceae	Trifolium hybridum	Trifolium hybridum				frö
Fabaceae	Trifolium sp.	Trifolium sp.	Klöver			frö	·	·	·	·
Fabaceae	Medicago lupulina	Medicago lupulina	Humlelusern			frö	·	·	·	·
Fabaceae	Medicago sativa	Medicago sativa
Fabaceae	Medicago sp.	Medicago sp.
Fabaceae	Lotus sp.	Lotus sp.
Hypericaceae	Hypericum perforatum	Hypericum perforatum	Äkta johannesört			frö	·	·	·	·
Juncaceae	Luzula multiflora	Luzula multiflora	Ängsfryle			frö	·	·	·	·
Juncaceae	Luzula campestri	Luzula campestri	Knippfryle			frö	·	·	·	·
Juncaceae	Luzula sp.	Luzula sp.	Fryle				·	·	·	·
Plantaginaceae	Plantago media	Plantago media	Rödkämpar			frukt
Poaceae	Poa annua	Poa annua	Vitgröe			frukt	·	·	·	·
Poaceae	Poa pratensis	Poa pratensis	Ängsgröe
Poaceae	Poa sp.	Poa sp.	Gröe			frukt	·	·	·	·
Poaceae	Festuca pratensis	Festuca pratensis	Ängssvingel			frukt
Poaceae	Festuca sp.	Festuca sp.				frukt
Poaceae	Cynosurus cristatus	Cynosurus cristatus	Kamäxing			frukt
Poaceae	Lolium perenne	Lolium perenne	Engelskt rajgräs			frukt	·	·	·	·
Polygalaceae	Polygala vulgaris	Polygala vulgaris	Jungfrulin
Primulaceae	Primula verus	Primula verus	Gullviva
Rosaceae	Potentilla reptans typ	Potentilla reptans typ	Revfingerört			nöt	·	·	·	·
Rosaceae	Agrimonia	Agrimonia	Småborre
Rosaceae	Alchemilla sp.	Alchemilla sp.
Rosaceae	Potentilla cf. Crantzii	Potentilla cf. Crantzii	Vårfingerört
Rubiaceae	Galium album	Galium album	Stormåra			frukt	·	·	·	·
Violaceae	Viola canina ssp. canina	Viola canina ssp. canina	Nattviol
	Ljunghedar	Heath land
Asteraceae	Arnica montana	Arnica montana	Slåttergubbar
Cyperaceae	Carex pilulifera	Carex pilulifera	Pillerstarr
Ericaceae	Calluna vulgaris	Calluna vulgaris	Ljung			frukt (frökapsel)	·	·	·	·
Ericaceae	Calluna vulgaris	Calluna vulgaris	Ljung			stam	·	·	·	·
Ericaceae	Empetrum nigrum	Empetrum nigrum	Kråkbär
Fabaceae	Genista anglica	Genista anglica	Nålginst
Fabaceae	Genista germanica	Genista germanica	Tysk ginst
Fabaceae	Genista pilosa	Genista pilosa	Hårginst
Poaceae	Desschampsia flexuosa	Desschampsia flexuosa	Kruståtel
Rubiaceae	Galium saxatile	Galium saxatile	Stenmåra			frö
Scropphulariaceae	Euphrasia micrantha	Euphrasia micrantha	Ljungögontröst
	Växter från hav och havsstränder	Wild taxa
Asteraceae	Tripleurospermum maritimum	Tripleurospermum maritimum	Kustbaldersbrå				·	·	·	·
Betulaceae	Alnus glutinosa	Alnus glutinosa	Kllibbal	Alder	fruit	frukt	·	3	2	·	·
Betulaceae	Betula pendula	Betula pendula	Vårtbjörk	Silver birch	fruit	fruit	9	7	6	2	·
Betulaceae	Betula pendula	Betula pendula	Vårtbjörk	Silver birch	bract	hänge	1	·	1	·	·
	Pinus silvestris	Pinus silvestris	Tall				·	·	·	·	·
Rosaceae	Prunus domestica ssp. Institia	Prunus domestica ssp. Institia	Krikon			kärna	·	·	·	·	·
Rosaceae	Prunus padus ssp. padus	Prunus padus ssp. padus	Hägg			frukt	·	·	·	·	·
Polygonaceae	Persicaria hydropiper	Bolboschoenus maritimus	Bitterpilört	Sea club-rush	fruit	nöt	2	·	·	·	·
		Carex sp.		True sedge indet.	fruit		1	·	·	·	·
Chenopodiaceae	Chenopodium sp.	Chenopodium sp.	Målla ospec.	Goosefoot sp.	fruit	nöt	·	·	1	·	·
Asteraceae	Cirsium cf. vulgare	Cirsium cf. vulgare	Vägtistel	Spear thistle	fruit	frukt	·	·	·	1	·
Asteraceae	Cirsium sp.	Cirsium sp.	Tistel	Thistle	fruit	frukt	1	·	·	·	·
Fagaceae	Fagus sylvatica	Fagus silvatica	Bok	Beech	leaf parts		√	√	√	√	·
Laminaceae	Galeopsis speciosa/bifida	Galeopsis cf. bifida	Hampdån/Toppdån	Bifid hemp-nettle	fruit	frukt	2	·	·	·	·
Boraginaceae	Myosotis cf. laxa	Myosotis cf. laxa	Sumpförgetmigej	Tufted forget-me-not	fruit	frukt	·	1	·	·	·
Cyperacea	Schoenoplectus maritimus	Schoenoplectus maritimus	Havssäv			nöt	·	·	·	·	·
Cyperaceae	Hierochloe odorata	Hierochloe odorata	Borstsäv			frukt	·	·	·	·	·
Fabaceae	Trifolium fragiferum	Trifolium fragiferum	Smultronklöver			nöt	·	·	·	·	·
Fucaceae	Fucus vesiculosus	Fucus vesiculosus	Blåstång				·	·	·	·	·
Plantaginaceae	Plantago cornopus	Plantago cornopus	Strandkämpar				·	·	·	·	·
Plantaginaceae	Plantago maritima	Plantago maritima	Gulkämpar				·	·	·	·	·
		Ranunculus sp.		Ranunculus	fruit		1	·	·	·	·
Rosaceae	Rosa cf. canina	Rosa cf. canina	Stenros	Dog-rose	stone	kärna	·	1	·	·	·
Polygonaceae	Rumex maritimus	Rumex maritimus	Strandskräppa	Golden dock	fruit with perianth	nöt	·	·	1	·	·
Polygonaceae	Rumex cf. maritimus	Rumex cf. maritimus	Strandskräppa	Golden dock	fruit	nöt	·	1	·	·	·
Ruppiaceae	Ruppia maritima	Ruppia maritima	Hårnating		fruit	frukt	·	·	·	·	·
Ruppiaceae	Ruppia sp.	Ruppia sp.	Natingar ospec.		fruit	frukt	·	·	·	·	·
Sargassaceae	Halidrys siliquosa	Halidrys siliquosa	Ektång		fruit		·	·	·	·	·
Polygonaceae	Rumex cf. acetosella	Rumex cf. acetosella	Bergsyra	Sheep's sorrel	fruit	nöt	·	1	·	·	·
Polygonaceae	Rumex sp.	Rumex sp.	Skräppor	Dock	fruit with perianth	nöt	2	2	·	·	·
Asteraceae	Taraxacum sp.	Taraxacum sp.	Maskros	Dandelion	fruit	frukt	1	·	·	·	·
Fagaceae	Quercus petraea	Quercus petraea	Bergsek	Sessile oak	leaf parts		√				·
		Viola cf. palustris		Marsh violet	fruit		·	2	·	·	·
Zannichelliaceae	Zannichellia palustris	Zannichellia palustris	Hårsäv	Horned pondweed	fruit	frukt	1	1	·	·	·
Zosteraceae	Zostera marina	Zostera marina	Bandtång			frö	·	·	·	·	·
Polygonaceae	Rumex conglomeraus	Rumex conglomeraus	Dikesskräppa			nöt	·	·	·	·	·
Polygonaceae	Rumex cf. sangineus	Rumex cf. sangineus	Skogsskräppa			nöt	·	·	·	·	·
Polygonaceae	Persicaria minor	Persicaria minor	Rosenpilört			nöt	·	·	·	·	·
Polygonaceae	Persicaria sp.	Persicaria sp.	Pilört			nöt	·	·	·	·	·
Polygonaceae	Fallopia dumetorum	Fallopia dumetorum	Lövbinda			nöt	·	·	·	·	·
Polygonaceae						nöt	·	·	·	·	·
Chenopodiaceae	Chenopodium murale-typ	Chenopodium murale-typ	Gatmålla-typ			nöt	·	·	·	·	·
Chenopodiaceae	Chenopodium hybridum	Chenopodium hybridum	Lönnmåla			nöt	·	·	·	·	·
Chenopodiaceae	Chenopodium glaucum typ	Chenopodium glaucum typ	Blåmålla			nöt	·	·	·	·	·
Chenopodiaceae	Cenopodium polyspermum	Cenopodium polyspermum	Fiskmålla			nöt	·	·	·	·	·
Chenopodiaceae	Chenopodium rubrum	Chenopodium rubrum	rödmålla			nöt	·	·	·	·	·
Chenopodiaceae	Chenopodium urbicum	Chenopodium urbicum	Bymålla			nöt	·	·	·	·	·
Chenopodiaceae	Chenopodium opulifolium	Chenopodium opulifolium	Olvonmålla			nöt	·	·	·	·	·
Chenopodiaceae	cf. Atriplex sp.	cf. Atriplex sp.	målla			nöt	·	·	·	·	·
Asteraceae		Asteraceae indet.	Korgblommiga växter ospec.	Flowering plants indet.	fruit	frukt	2	1	·	·	·
Caryophyllaceae	Caryophyllaceae	Caryophyllaceae indet.	ospec.	Carnation indet.	fruit	frö	·	·	1	·	·
Caryophyllaceae	Arenaria cf. leptoclados	Arenaria cf. leptoclados	cf. Spädnarv			frö	·	·	·	·	·
Caryophyllaceae	Stellaria cf. nemorum	Stellaria cf. nemorum	cf. Lundarv			frö	·	·	·	·	·
Caryophyllaceae	Stellaria sp.	Stellaria sp.	Stjärnblomma/arv ospec.			frö	·	·	·	·	·
Caryophyllaceae	Stellaria pallida typ	Stellaria pallida typ	Blekarv			frö	·	·	·	·	·
Caryophyllaceae	Cerastium sp.	Cerastium sp.	Arv ospec.			frö	·	·	·	·	·
Caryophyllaceae	cf. Saponaria officinalis	cf. Saponaria officinalis	Såpnejlika			frö	·	·	·	·	·
Caryophyllaceae	Spergularia rubra	Spergularia rubra	Rödnarv			frö	·	·	·	·	·
Caryophyllaceae	Silene sp.	Silene sp.	Glim ospec.			frö	·	·	·	·	·
Ranunculaceae	Ranunculus sp.	Ranunculus sp.	Smörblommor ospec.			nöt	·	·	·	·	·
Papaveraceae	cf. Papaver sp.	cf. Papaver sp.	cf. Vallmo			frö	·	·	·	·	·
Papaveraceae	Chelidonium majus	Chelidonium majus	Skelört			frö	·	·	·	·	·
Papaveraceae	Papaver somniferum	Papaver somniferum	Opievallmo			frö	·	·	·	·	·
Portulacaceae	cf. Portulaca oleracea	cf. Portulaca oleracea	Vildportlak			frö	·	·	·	·	·
Brassicaceae	Brassicaceae indet.	Brassicaceae indet.	Kålväxter ospec.			frö	·	·	·	·	·
Brassicaceae	Brassica sp.	Brassica sp.	ospec.			frö	·	·	·	·	·
Brassicaceae	Brassica niger	Brassica niger	Svartsenap			frö	·	·	·	·	·
Rosaceae	Alchemilla cf. acutiloba	Alchemilla cf. acutiloba	cf. Stjärndaggkåpa			frö	·	·	·	·	·
Rosaceae	Agrimonia eupatoria	Agrimonia eupatoria	Småborre			frukt	·	·	·	·	·
Rosaceae	Agrimonia procera	Agrimonia procera	Luktsmåborre			frukt	·	·	·	·	·
Rosaceae	Potentilla sp.	Potentilla sp.	Fingerört			nöt	·	·	·	·	·
Rosaceae	Prunus avium/cerasus	Prunus avium/cerasus	Sur-/sötkörsbär			kärna	·	·	·	·	·
Rosaceae	Prunus domestica ssp. domestica	Prunus domestica ssp. domestica	Plommon			kärna	·	·	·	·	·
Fabaceae	ospec.	Fabaceae indet.		Legumes indet.	testa, fragm.	frö	·	1	·	·	·
Fabaceae	ospec.	Fabaceae indet.		Legumes indet.	seed	frö	·	·	1	·	·
Fabaceae	ospec.	Fabaceae indet.		Legumes indet.	fruit	frö	·	·	1	·	·
Geraniaceae	cf. Eródium circutárium	Fabaceae indet.	Skatnäva			frö	·	·	·	·	·
Malvaceae	Malva neglecta	Fabaceae indet.	Skär kattost			frö	·	·	·	·	·
Hypericaceae	Hypericum maculatum	Fabaceae indet.	Fyrkantig johannesört			frö	·	·	·	·	·
Violaceae	Viola sp.	Fabaceae indet.	Viol			frö	·	·	·	·	·
Cluciaceae	Hypericum cf. tetrapterum	Fabaceae indet.	Kärrjohannesört			frö	·	·	·	·	·
Violaceae	Viola cf. tricolor	Fabaceae indet.	Styvmorsviol			frö	·	·	·	·	·
Apiaceae	Apiaceae ospec.	Fabaceae indet.	Flockblommiga växter ospec.			frukt	·	·	·	·	·
Apiaceae	Daucus carota	Fabaceae indet.	Vildmorot/morot			frukt	·	·	·	·	·
Rubiaceae	Galium sp.	Fabaceae indet.	Måra			frukt	·	·	·	·	·
Lamiaceae	Lamium sp.	Fabaceae indet.	Plistrar			frukt	·	·	·	·	·
Lamiaceae	Galeopsis sp.	Fabaceae indet.	Dån			frukt	·	·	·	·	·
Lamiaceae	Lamiastrum galeóbdolon	Fabaceae indet.	Gulplister				·	·	·	·	·
Lamiaceae	Lamium cf. confertum	Fabaceae indet.	Mellanplister			frukt	·	·	·	·	·
Lamiaceae	Stachys sp.	Fabaceae indet.	Syska			frukt	·	·	·	·	·
Lamiaceae	Lamiaceae indet.	Fabaceae indet.	Kransblomma			frö	·	·	·	·	·
Scropphulariaceae	Veronica sp.	Fabaceae indet.	Veroniker			frö	·	·	·	·	·
Caprifoliaceae	Sambucus racemosa	Fabaceae indet.	Druvfläder			frö	·	·	·	·	·
Caprifoliaceae	Sambucus ebulus	Fabaceae indet.	Sommarfläder			frö	·	·	·	·	·
Plantaginaceae	Plantago sp.	Fabaceae indet.	kämpar			frö	·	·	·	·	·
Plantaginaceae	Plantago arenaria	Fabaceae indet.	Sandkämpar			frö	·	·	·	·	·
Plantaginaceae	cf. Plantago media	Fabaceae indet.					·	·	·	·	·
Asteraceae	Bidens cernua	Bidens cernua	Nickskära			frukt	·	·	·	·	·
Asteraceae	Arctium cf. minus	Arctium cf. minus	Liten kardborre			frukt	·	·	·	·	·
Asteraceae	Arctium sp.	Arctium sp.	Kardborre			frukt	·	·	·	·	·
Asteraceae	Carduus/Cirsium	Carduus/Cirsium	Piggtistlar/tistlar			frukt	·	·	·	·	·
Asteraceae	Centaurea sp.	Centaurea sp.	Klint			frukt	·	·	·	·	·
Asteraceae	Hypochoeris glabra	Hypochoeris glabra	Åkerfibbla			frukt	·	·	·	·	·
Asteraceae	Tanaccetum vulgare	Tanaccetum vulgare	Renfana								·
Asteraceae	cf. Picris hieracioides	cf. Picris hieracioides	cf. Bitterfibbla			frukt	·	·	·	·	·
Potamogetonaceae	Potamogeton sp.	Potamogeton sp.	Natar ospec.			frukt	·	·	·	·	·
Juncaceae	cf. Luzula sp.	cf. Luzula sp.	Fryle				·	·	·	·	·
Cyperaceae	Cyperaceae indet.	Cyperaceae indet.	Halvgräs ospec.			nöt	·	·	·	·	·
Cyperaceae	Carex echionata	Carex echionata	Stjänstarr			nöt	·	·	·	·	·
Cyperaceae	Carex hirta	Carex hirta	Grusstarr			nöt	·	·	·	·	·
Cyperaceae	Isolepis (Scirpus) setaceus	Isolepis (Scirpus) setaceus	Borstsäv			nöt	·	·	·	·	·
Poaceae	Poaceae indet.	Poaceae indet.	Gräs ospec.			frukt	·	·	·	·	·
Poaceae	Poaceae indet.	Poaceae indet.	Gräs ospec.	Grasses indet.	ear	ax	1	·	·	·	·
	Träd, buskar	Trees and bushes
Rosaceae	Sorbus intermedia	Sorbus intermedia	Oxel			kärna	·	·	·	·
Rosaceae	Crataegus sp.	Crataegus sp.	Hagtorn			kärna	·	·	·	·
Rosaceae	Prunus spinosa	Prunus spinosa	Slån			kärna	·	·	·	·
	Övriga växter	Other
Polygonaceae	ospec.	ospec.				nöt	·	·	·	·
Poaceae	cf. Eleusine indica	cf. Eleusine indica	gåshirs			frukt	·	·	·	·
Poaceae	Bromus sp.	Bromus sp.	Losta			frukt	·	·	·	·
Poaceae	Avena stingosa	Avena stingosa	Purrhavre			frukt	·	·	·	·
Poaceae	cf. Lolium sp.	cf. Lolium sp.				frukt	·	·	·	·
Poaceae	cf. Phleum	cf. Phleum	cf. Timotej			frukt	·	·	·	·
Poaceae	Milium effusum	Milium effusum	Hässlebrodd			frukt	·	·	·	·
	Övrigt	Other
	Förkoln. matskorpa el. liknande	Förkoln. matskorpa el. liknande					·	·	·	·
		Pedicle indet.					·	·	1	·	·
	Växtdelar	Leaf indet.	Träkol		leaf parts		1	·	·	·	·
			Förkolnade örtdelar				√	·	·	·	·
			Bladmossor				√	·	·	·	·
		Indeterminate vegetiative fragm.			twigs and woods		√	√	√	√	·
		Indeterminate	Glas		seeds		√	√	√	·	·
		TOTAL					324	1507	1025	241
